# Supplementary material
Source: publisher site journal article supplement (https://www.dovepress.com/article/264600)
Supplement: Supplementary file 1 [file get_supplementary_file.php]

**MiR-101-3p and syn-cal14.1a synergy in suppressing EZH2-induced progression of breast cancer**

Huabo Jiang1,#, Li Li2, #, Jingjing Zhang3, Zhong Wan4, Yuanyuan Wang5, Jingjing Hou6,*, Yongsheng Yu1,*

1 Clinical and Translational Research Center, Shanghai First Maternity and Infant Hospital, Tongji University School of Medicine, Shanghai, China;

2 Assisted Reproduction Technology Center, Shuguang Hospital Affiliated to Shanghai University of Traditional Chinese Medicine, Shanghai, China;

3 Department of Plastic surgery, Zhongshan Hospital of Xiamen University, Fujian, China;

4 Urologic Medical Center, Shanghai General Hospital, Shanghai Jiao Tong University School of Medicine, Shanghai, China;

5 Department of Health Medicine, Zhongshan Hospital of Xiamen University, Fujian, China;

6 Department of Gastrointestinal Surgery, Institute of Gastrointestinal Oncology, Zhongshan Hospital of Xiamen University, Fujian, China.

# Huabo Jiang and Li Li contributed equally to this paper.

*Correspondence: [jjhou@xmu.edu.cn](mailto:jjhou@xmu.edu.cn) (J.H.); [yongshengyu@tongji.edu.cn (Y.Y.)](mailto:yongshengyu@tongji.edu.cn%20(Y.Y.)%20)

| **Characteristics** | **BC(N=10)** | **Normal(N=2)** |
| --- | --- | --- |
| Age(mean±standard deviation ) | 56.3+9.4 | 47+22.6 |
| Tumor status (T1/T2/T3) | 3/7/0 | / |
| Lymph node status (Absence /Presence) | 5/5 | / |
| Distant metastasis (M0/M1) | 10/0 | / |
| TNM stage (I/II/III) | 3/4/3 | / |

**Supplementary** **Table 1.** Clinicopathologic characteristics of patients. Tumor stage and histological grade were classified in accordance with the criteria of International Union Agains Cancer (UICC).

| **Gene/Peptide name** | **Sequences** |
| --- | --- |
| miR-101-3p mimics | |
| Sense | 5’-UACAGUACUGUGAUAACUGAA-3’ |
| Antisense | 5’-UUCAGUUAUCACAGUACUGUA-3’ |
| Control mimics | |
| Sense | 5’-UUUGUACUACACAAAAGUACUG-3’ |
| Antisense | 5’-CAGUACUUUUGUGUAGUACAAA-3’ |

**Supplementary** **Table 2 Transfection sequences**


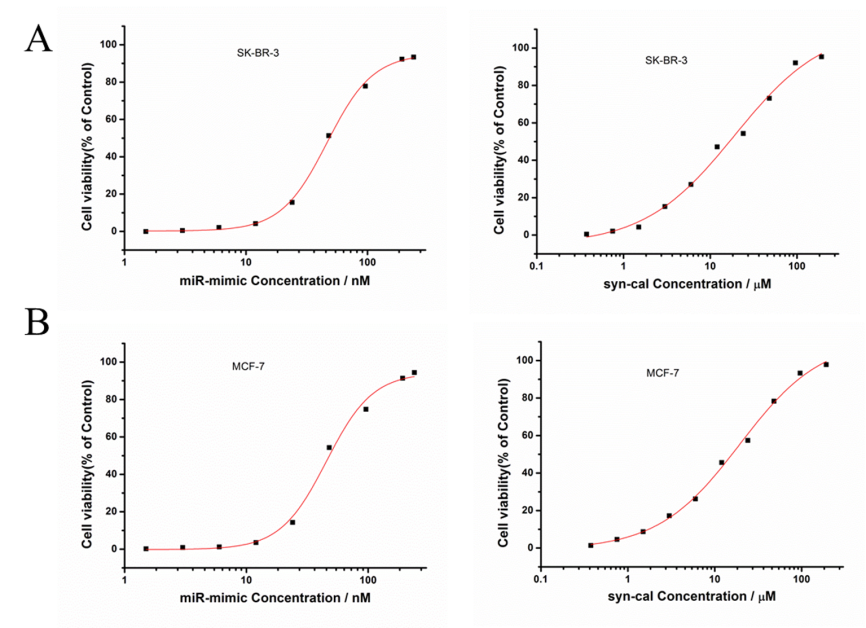


**Supporting information Figure 1.** Effect of varying concentrations of miR-101-3p mimic or syn-cal14.1a on the proliferation of SK-BR-3 and MCF-7 cells.
